# Supplementary material
Source: PubMed Central journal article supplement (PMC4364180)
Supplement: pnas.201421202SI.pdf [file pnas.201421202SI.pdf]

# Supporting Information

Leone et al. 10.1073/pnas.1421202112

## SI Materials and Methods

**Decomposition of the Calculated Free Energy of Selectivity.** To evaluate the relative contribution of local and remote factors to the calculated value of  $\Delta\Delta G_{\text{sel}}$  (Eq. 6) between the *I. tartaricus* and *E. hirae* rings, both molecular systems were divided into three groups of atoms. For the *I. tartaricus* ring, the first group includes E65 and the bound  $\text{Na}^+/\text{H}^+$  in one of the ion-binding sites; the second group includes residues Q32, V63, S66, T67, and Y70, plus a bound structural water molecule, in the same binding site; and the third group comprises all other atoms in the system (protein, water, lipid, ions). For the *E. hirae* ring, the first group includes E139 in one of the ion-binding sites, plus the bound  $\text{Na}^+/\text{H}^+$ ; the second group includes L61, T64, Q65, Y68, and Q110 in the same binding site; and the third group includes the rest of the system. If  $\mathbf{X}$ ,  $\mathbf{Y}$ , and  $\mathbf{Z}$  denote the coordinates of the atoms in each group, the potential energy function for a given ion-bound state  $i$  may be written as follows:

$$U^i(\mathbf{X}, \mathbf{Y}, \mathbf{Z}) = U_{\text{self}}^i(\mathbf{X}) + U_{\text{self}}^i(\mathbf{Y}, \mathbf{Z}) + U_{\text{inter}}^i(\mathbf{X}, \mathbf{Y}) + U_{\text{inter}}^i(\mathbf{X}, \mathbf{Z}), \quad [\text{S1}]$$

where  $U_{\text{self}}$  refers to self-interactions within a given group of atoms and  $U_{\text{inter}}$  refers to cross-interactions between two groups. (When long-range electrostatic interactions are calculated using the particle mesh Ewald method, Eq. S1 is an approximation. For the systems simulated in this study, the difference between the left and right sides of Eq. S1 is in the order of  $10^{-4}$  kcal/mol.) If  $i = 0$  denotes the  $\text{Na}^+$ -bound state, and  $i = 1$  denotes the  $\text{H}^+$ -bound state, the dual-topology potential-energy function used in our free-energy perturbation (FEP) calculations would read as follows:

$$U(\lambda) = \lambda \left[ U_{\text{self}}^1(\mathbf{X}^1) + U_{\text{self}}^1(\mathbf{Y}, \mathbf{Z}) + U_{\text{inter}}^1(\mathbf{X}^1, \mathbf{Y}) + U_{\text{inter}}^1(\mathbf{X}^1, \mathbf{Z}) \right] + (1 - \lambda) \left[ U_{\text{self}}^0(\mathbf{X}^0) + U_{\text{self}}^0(\mathbf{Y}, \mathbf{Z}) + U_{\text{inter}}^0(\mathbf{X}^0, \mathbf{Y}) + U_{\text{inter}}^0(\mathbf{X}^0, \mathbf{Z}) \right], \quad [\text{S2}]$$

where  $\lambda$  denotes the coupling parameter used to control the transformation between the two end states. Note that the dual-topology scheme pertains only to the degrees of freedom represented by  $\mathbf{X}$ , and therefore we differentiate  $\mathbf{X}^1$  and  $\mathbf{X}^0$ . However, the self-energy terms that pertain to  $\mathbf{Y}$  and  $\mathbf{Z}$  are identical. Therefore, Eq. S2 can be simplified as follows:

$$U(\lambda) = \lambda \left[ U_{\text{self}}^1(\mathbf{X}^1) + U_{\text{inter}}^1(\mathbf{X}^1, \mathbf{Y}) + U_{\text{inter}}^1(\mathbf{X}^1, \mathbf{Z}) \right] + (1 - \lambda) \left[ U_{\text{self}}^0(\mathbf{X}^0) + U_{\text{inter}}^0(\mathbf{X}^0, \mathbf{Y}) + U_{\text{inter}}^0(\mathbf{X}^0, \mathbf{Z}) \right] + U_{\text{self}}(\mathbf{Y}, \mathbf{Z}). \quad [\text{S3}]$$

In the FEP scheme, the free-energy difference between the  $\text{Na}^+$ - and  $\text{H}^+$ -bound states is defined as follows:

$$\Delta G_{\text{FEP}} = - \sum_{j=1}^n k_{\text{B}} T \log \left\langle \exp \left\{ - \frac{1}{k_{\text{B}} T} [U(\lambda_{j+1}) - U(\lambda_j)] \right\} \right\rangle_{\lambda_j}, \quad [\text{S4}]$$

where the  $j$  index refers to  $n$  intermediate values of  $\lambda$  between 0 and 1, and the angle brackets denote a time average over a simulation in which the coupling parameter in Eq. 2 equals to  $\lambda_j$ . Provided that the typical differences between  $\lambda_{j+1}$  and  $\lambda_j$  values are sufficiently small, we can assume that  $[U(\lambda_{j+1}) - U(\lambda_j)] \ll k_{\text{B}} T$ , and thus Eq. S4 can be approximated as follows:

$$\Delta G_{\text{FEP}} \approx - \sum_{j=1}^n k_{\text{B}} T \log \left\langle 1 - \frac{1}{k_{\text{B}} T} [U(\lambda_{j+1}) - U(\lambda_j)] \right\rangle_{\lambda_j} \approx \sum_{j=1}^n \left\langle U(\lambda_{j+1}) - U(\lambda_j) \right\rangle_{\lambda_j}. \quad [\text{S5}]$$

Introducing Eq. S3 into Eq. S5 leads to the following:

$$\Delta G_{\text{FEP}} \approx \sum_{j=1}^n (\lambda_{j+1} - \lambda_j) \left[ \left\langle \Delta U_{\text{self}}(\mathbf{X}) \right\rangle_{\lambda_j} + \left\langle \Delta U_{\text{inter}}(\mathbf{X}, \mathbf{Y}) \right\rangle_{\lambda_j} + \left\langle \Delta U_{\text{inter}}(\mathbf{X}, \mathbf{Z}) \right\rangle_{\lambda_j} \right], \quad [\text{S6}]$$

where  $\Delta U$  denotes difference in the potential energy terms  $U^1$  and  $U^0$  for the relevant subset of coordinates. Note that a formulation of the free energy as in the thermodynamic integration (TI) method leads to an expression analogous to that in Eq. S6:

$$\Delta G_{\text{TI}} = \int_0^1 \left\langle \frac{\partial U(\lambda)}{\partial \lambda} \right\rangle_{\lambda} d\lambda = \sum_{j=1}^n \left\langle \frac{\partial U(\lambda)}{\partial \lambda} \right\rangle_{\lambda_j} \Delta \lambda = \sum_{j=1}^n \Delta \lambda \left[ \left\langle \Delta U_{\text{self}}(\mathbf{X}) \right\rangle_{\lambda_j} + \left\langle \Delta U_{\text{inter}}(\mathbf{X}, \mathbf{Y}) \right\rangle_{\lambda_j} + \left\langle \Delta U_{\text{inter}}(\mathbf{X}, \mathbf{Z}) \right\rangle_{\lambda_j} \right]. \quad [\text{S7}]$$

Eqs. S6 and S7 permit us to assess the extent to which local (i.e.,  $\mathbf{X}$  and  $\mathbf{Y}$ ) or remote (i.e.,  $\mathbf{Z}$ ) interactions contribute to the difference in the free energy of selectivity of the two systems considered. Specifically, the breakdown in Fig. 4B corresponds to the following:

$$\Delta \Delta G_{\text{TI}}(\text{site}) = \sum_{j=1}^n (\lambda_{j+1} - \lambda_j) \left[ \left\langle \Delta \Delta U_{\text{self}}(\mathbf{X}) \right\rangle_{\lambda_j} + \left\langle \Delta \Delta U_{\text{inter}}(\mathbf{X}, \mathbf{Y}) \right\rangle_{\lambda_j} \right], \quad [\text{S8}]$$

$$\Delta \Delta G_{\text{TI}}(\text{rest}) = \sum_{j=1}^n (\lambda_{j+1} - \lambda_j) \left\langle \Delta \Delta U_{\text{inter}}(\mathbf{X}, \mathbf{Z}) \right\rangle_{\lambda_j}, \quad [\text{S9}]$$

$$\Delta \Delta G_{\text{TI}}(\text{total}) = \Delta \Delta G_{\text{TI}}(\text{site}) + \Delta \Delta G_{\text{TI}}(\text{rest}). \quad [\text{S10}]$$

**Water Occupancy in the  $\text{H}^+$ -Bound State of the *I. tartaricus* Binding Site.** The crystal structure of the  $\text{Na}^+$ -bound state of the *I. tartaricus* c-ring shows a water molecule co-coordinating the ion. Whether or not this water molecule remains in the  $\text{H}^+$  bound state is a priori unknown. However, the binding free energy of this water molecule to the  $\text{H}^+$ -bound state can be deduced by comparing the calculated free-energies differences between the  $\text{Na}^+$ - and  $\text{H}^+$ -bound states in either case. When it is assumed that the water molecule remains in the  $\text{H}^+$ -bound state, i.e., case a in Fig. 4A, the

alchemical transformation between the Na<sup>+</sup>- and H<sup>+</sup>-bound states pertains only the carboxyl group of E65 and the ion; i.e., the water molecule is coupled to the molecular system throughout the FEP simulation. In this case, the following:

$$\Delta G_{\text{sel}}^{(a)}(\text{Na}^+ \rightarrow \text{H}^+) = \Delta G_{\text{site}}(\text{E65} : \text{Na}^+ \rightarrow \text{E65} : \text{H}^+) - \Delta G_{\text{hyd}}(\text{E65} : \text{Na}^+ \rightarrow \text{E65} : \text{H}^+). \quad [\text{S11}]$$

However, if it is assumed that the water molecule is not present in the H<sup>+</sup>-bound state, i.e., case b in Fig. 4A, it is necessary to decouple it from the molecular system as the Na<sup>+</sup>-bound state is transformed in the H<sup>+</sup>-bound state. In practice, the water molecule is artificially restrained to remain within the binding site as it is decoupled from the system, so as to facilitate the convergence of the calculation. We achieve this through distance restraints to T67:O<sub>y</sub> and A64:O. The free energy of selectivity in this case is as follows:

$$\Delta G_{\text{sel}}^{(b)}(\text{Na}^+ \rightarrow \text{H}^+) = \Delta G_{\text{site}}(\text{E65} : \text{Na}^+ : \text{W} \rightarrow \text{E65} : \text{H}^+) - \Delta G_{\text{hyd}}(\text{E65} : \text{Na}^+ \rightarrow \text{E65} : \text{H}^+) + \Delta G_{\text{hyd}}(\text{W}) + k_{\text{B}}T \log \frac{V_{\text{site}}}{V^{\circ}}. \quad [\text{S12}]$$

The last two terms in Eq. S12 reflect the energetic gain associated with the release of the water molecule into the bulk. The first term,  $\Delta G_{\text{hyd}}(\text{W})$ , is the hydration free energy of the water molecule, which is computed separately (−6.5 kcal/mol); the second term reflects the gain in conformational entropy.  $V^{\circ}$  is the standard-state volume, i.e., the volume accessible at a concentration of 1 M, or 1,661 Å<sup>3</sup>.  $V_{\text{site}}$  is the volume accessible to the water molecule in the decoupled state. This volume is limited, owing to the distance restraints imposed during the calculation; specifically, this value was estimated to be ~111 Å<sup>3</sup>. Note that the precise choice of restraints will affect the value of  $V_{\text{site}}$ , but also

the value of  $\Delta G_{\text{site}}$  resulting from the alchemical transformation; therefore,  $\Delta G_{\text{sel}}$  is not dependent on this choice.

To calculate the standard binding free energy of the water molecule to the H<sup>+</sup>-bound state, a similar alchemical transformation could be used:

$$\Delta G_{\text{b}}^{\circ}(\text{W}) = \Delta G_{\text{site}}(\text{E65} : \text{H}^+ : \text{W} \rightarrow \text{E65} : \text{H}^+) - \Delta G_{\text{hyd}}(\text{W}) + k_{\text{B}}T \log \frac{V_{\text{site}}}{V^{\circ}}. \quad [\text{S13}]$$

Note, however, that this transformation is related to those in Eqs. S11 and S12 as follows:

$$\begin{aligned} \Delta G_{\text{site}}(\text{E65} : \text{Na}^+ : \text{W} \rightarrow \text{E65} : \text{H}^+) &= \Delta G_{\text{site}}(\text{E65} : \text{Na}^+ : \text{W} \rightarrow \text{E65} : \text{H}^+ : \text{W}) \\ &+ \Delta G_{\text{site}}(\text{E65} : \text{H}^+ : \text{W} \rightarrow \text{E65} : \text{H}^+). \end{aligned} \quad [\text{S14}]$$

Therefore, the binding free energy of the water molecule to the H<sup>+</sup> bound state is simply the following:

$$\Delta G_{\text{b}}^{\circ}(\text{W}) = \Delta G_{\text{sel}}^{(b)}(\text{Na}^+ \rightarrow \text{H}^+) - \Delta G_{\text{sel}}^{(a)}(\text{Na}^+ \rightarrow \text{H}^+). \quad [\text{S15}]$$

That is, by comparing the values of  $\Delta G_{\text{sel}}$  in cases a and b, we circumvent a calculation in which only the water molecule in question is decoupled from the H<sup>+</sup>-bound state. From the data shown in Fig. 4A, the calculated value of  $\Delta G_{\text{b}}^{\circ}(\text{W})$  is −1.6 kcal/mol. That is, binding of the water to the H<sup>+</sup>-bound state is energetically favorable. The corresponding dissociation constant,

$$K_{\text{d}} = C^{\circ} \exp \left\{ \frac{\Delta G_{\text{b}}^{\circ}(\text{W})}{k_{\text{B}}T} \right\}, \quad [\text{S16}]$$

is therefore 69 mM (where  $C^{\circ} = 1$  M). Thus, the probability of occupancy,  $P = [1 + K_{\text{d}}/C_{\text{w}}]^{-1} = 0.9987$  ( $C_{\text{w}} = 55.5$  M).

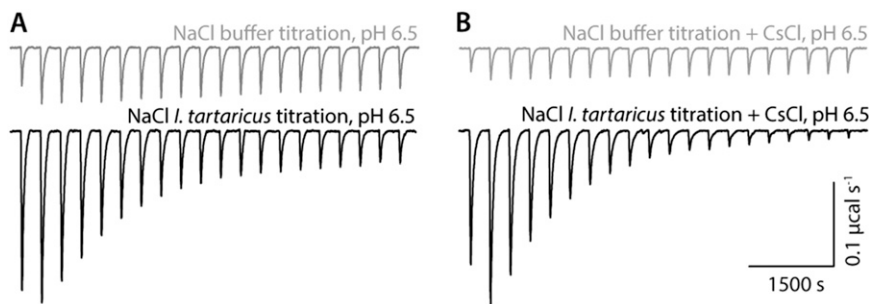

**Fig. S1.** Evidence of Na<sup>+</sup> binding to the *I. tartaricus* c-ring from ITC experiments. (A) Exothermic ITC signals measured in a representative NaCl titration of a protein sample [in 1% *n*-octyl-β-D-glucopyranoside (OG), 10 mM Mes/TMAOH buffer at pH 6.5] (black), compared with an equivalent titration of the buffer solution without the protein (gray); the magnitude of the signals before saturation reflect Na<sup>+</sup> binding to the protein, whereas those after saturation reflect the heat of dilution of the injected NaCl aliquots. (B) Comparison of ITC signals measured as in A, using a buffer containing CsCl (~3 mM). Because Cs<sup>+</sup> does not bind to the c-ring (Fig. S2), CsCl can be used to preset the ionic strength of the buffer and thus minimize the heat of dilution of the injected NaCl aliquots.



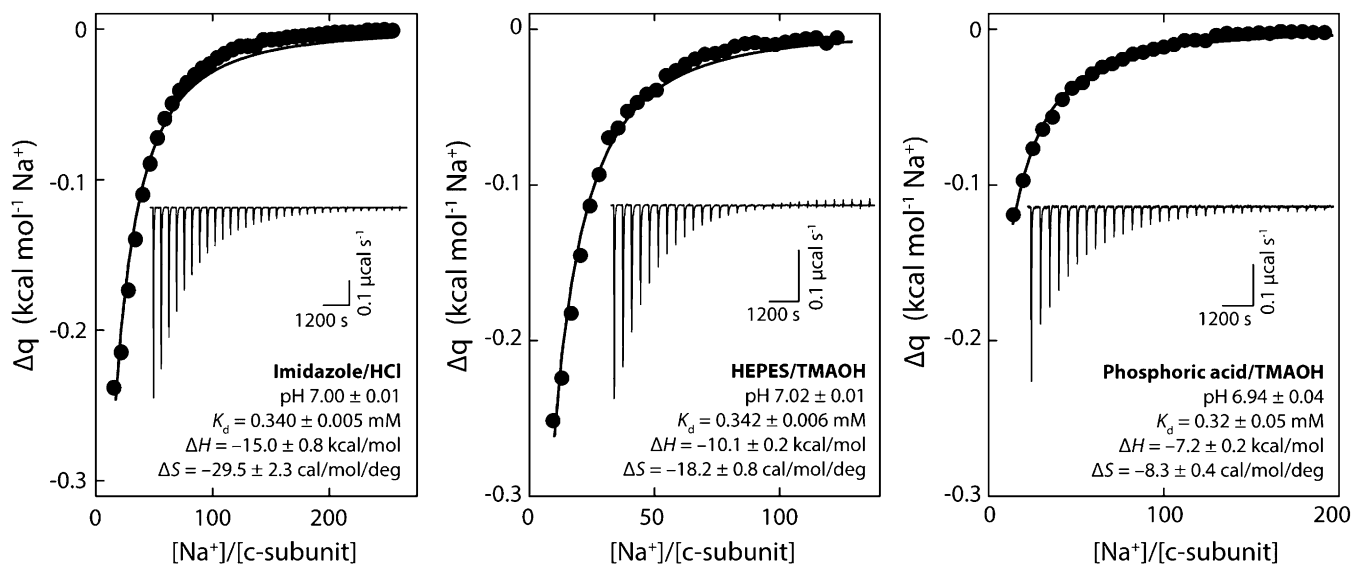

**Fig. S4.** Dependence between the apparent enthalpy of  $\text{Na}^+$  binding and the enthalpy of ionization of the buffer. The figure shows ITC signals from representative  $\text{NaCl}$  titrations of *c*-ring samples in three different buffers (10 mM buffer, 1% OG, total ionic strength set to 60 mM) at pH 7 (*Insets*), alongside the corresponding binding isotherms (black circles, black curve) and thermodynamic parameters (obtained from two independent measurements for each buffer). Because the *I. tartaricus* *c*-ring does not have any histidine residues, the apparent enthalpy of  $\text{Na}^+$  binding to the *c*-ring,  $\Delta H$ , which also reflects  $\text{H}^+$  release, should depend on the ionization enthalpy of the buffer, whereas the dissociation constant should not. The buffers used were imidazole/HCl, Hepes/TMAOH, and phosphoric acid/TMAOH. The published ionization enthalpy values for these buffers are  $8.74 \pm 0.01$ ,  $5.02 \pm 0.02$ , and  $1.22 \pm 0.01$  kcal/mol, respectively (1). Note that the ionization enthalpy of these buffers is largely independent of the ionic strength (2).

1. Fukada H, Takahashi K (1998) Enthalpy and heat capacity changes for the proton dissociation of various buffer components in 0.1 M potassium chloride. *Proteins* 33(2):159–166.
2. Goldberg RN, Kishore N, Lennen RM (2002) Thermodynamic quantities for the ionization reactions of buffers. *J Phys Chem Ref Data* 31(2):231–370.

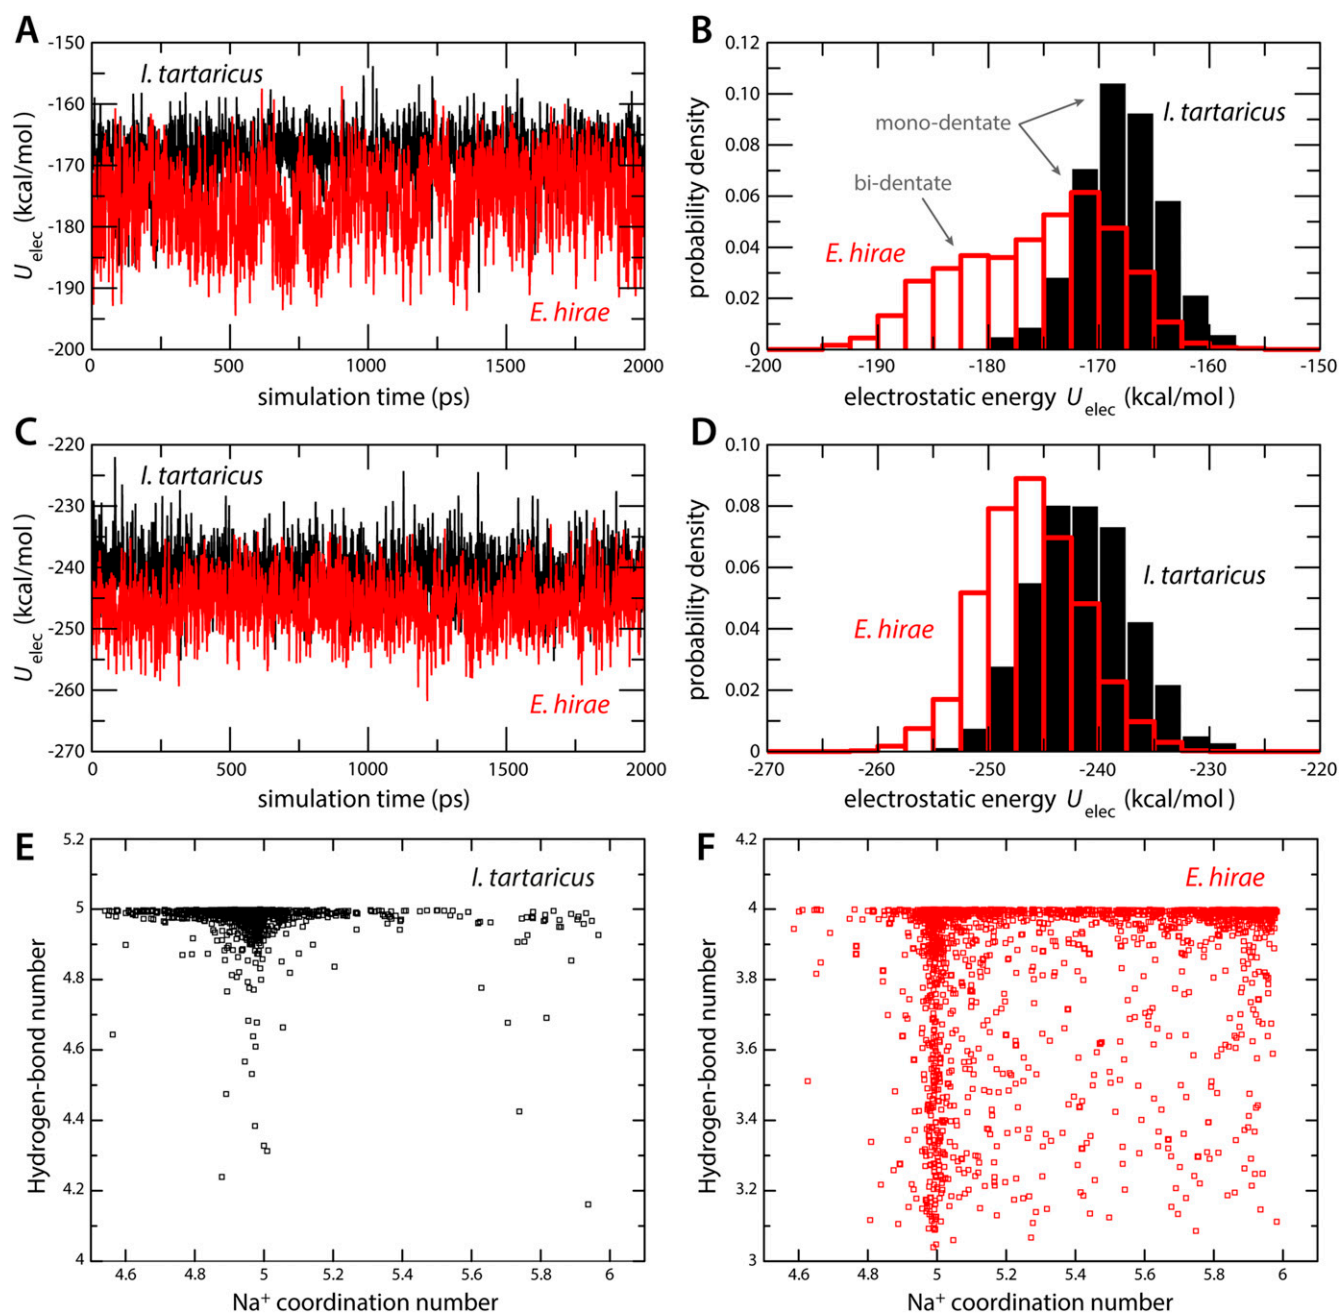

**Fig. S5.** Alternative modes of  $\text{Na}^+$  coordination in the *I. tartaricus* and *E. hirae* c-rings. The figure analyzes the energetics and geometry of the  $\text{Na}^+$ -bound state for one of the binding sites in each c-ring, in 2,000 simulation snapshots over a 2-ns molecular dynamics trajectory. (A and B) Time series of the electrostatic interaction energy for the carboxyl- $\text{Na}^+$  pair in the *I. tartaricus* (black) and *E. hirae* (red) binding sites, alongside the probability distribution thereof. It is apparent that the *E. hirae* distribution is bimodal and that the mode not present in *I. tartaricus* (bidentate) results in a more favorable electrostatic energy. (C and D) Time series of the total ion-protein and protein-protein electrostatic interaction energy for  $\text{Na}^+$  and all its coordinating groups, alongside the probability distribution thereof. The overall electrostatic energy of the  $\text{Na}^+$ -bound state remains more negative for the *E. hirae* c-ring. (E and F) The  $\text{Na}^+$  coordination number is plotted against the number of hydrogen bonds between the protein residues (and water molecule) that form the  $\text{Na}^+$ -binding site (Fig. 5). A  $\text{Na}^+$ -coordination number of 5 corresponds to a monodentate interaction between  $\text{Na}^+$  and the conserved glutamate in the binding site (E65 and E139, respectively); by contrast, a coordination number of 6 reflects a bidentate interaction (Fig. 5). The data shows that the bidentate mode is feasible in *E. hirae* but not in *I. tartaricus*. Moreover, it shows that the bidentate mode in *E. hirae* does not imply a loss of H-bonding interactions within the binding site, which indicates that this mode contributes significantly to the energetics of  $\text{Na}^+$  binding, despite the fact that the monodentate mode is more probable (consistent with the X-ray structure of this c-ring); indeed, the H-bonding number for the bidentate mode is, on average, closer to the maximum value of 4. The  $\text{Na}^+$ -coordination number was determined as described in Fig. 5. The hydrogen bond number was defined as  $N_{\text{HB}} = \sum_{ij} [1 - (r_{ij}/r_0)^{30}] [1 - (r_{ij}/r_0)^{60}]^{-1}$ , where  $r_{ij}$  denotes the distances between pairs of atoms potentially engaged in hydrogen-bonding interactions within the ion-binding sites (in the  $\text{Na}^+$ -bound state), and  $r_0 = 3.4 \text{ \AA}$ . For *I. tartaricus*, five distance pairs were considered, namely E65: $\text{O}_{\text{e}1/2}$  - S66: $\text{O}_{\text{y}}$ , E65: $\text{O}_{\text{e}1/2}$  - Y70: $\text{O}_{\text{H}}$ , E65: $\text{O}_{\text{e}1/2}$  - Q32: $\text{N}_{\text{e}2}$ , T67: $\text{O}_{\text{y}}$  - G25: $\text{O}$ , and W: $\text{O}$  - T67: $\text{O}_{\text{y}}$ . In *E. hirae*, the maximum number of H-bonds is four, namely E139: $\text{O}_{\text{e}1/2}$  - T64: $\text{O}_{\text{y}}$ , E139: $\text{O}_{\text{e}1/2}$  - Y68: $\text{O}_{\text{H}}$ , E139: $\text{O}_{\text{e}1/2}$  - Q110: $\text{N}_{\text{e}2}$ , and Q65: $\text{N}_{\text{e}2}$  - Q110: $\text{O}_{\text{e}1}$ .

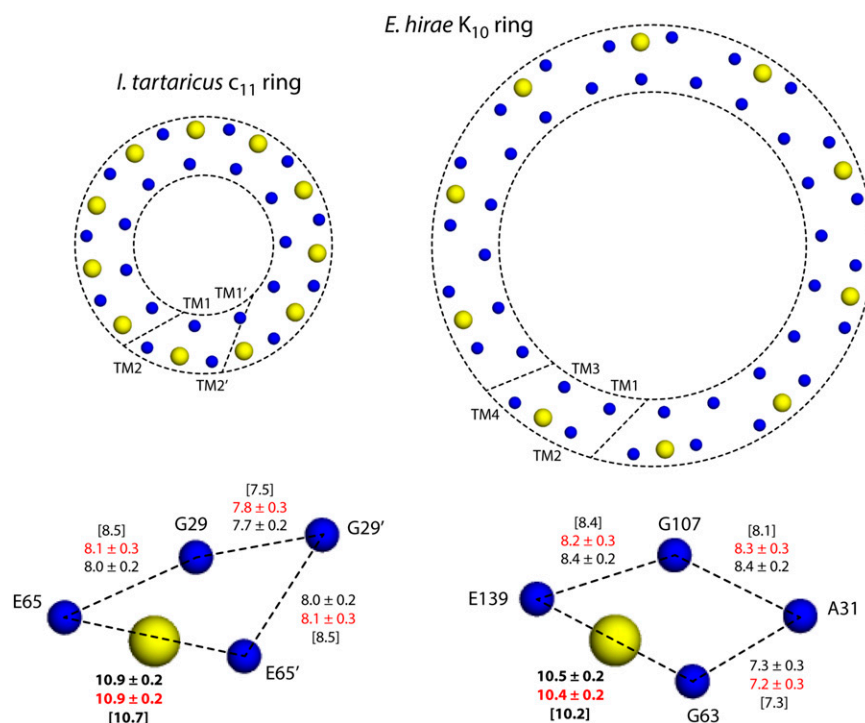

**Fig. S6.** Overall geometrical features of the *I. tartaricus* and *E. hirae* c-rings. The figure shows the location of representative C $\alpha$  atoms in the inner and outer helices of each of the c- and K-subunits in each ring (blue spheres), alongside the bound Na<sup>+</sup> ions. Analysis of the distances between these C $\alpha$  atoms demonstrates that the outer helices that flank the ion-binding sites in *E. hirae* are closer together than in *I. tartaricus*. This is likely due to the fact that the curvature of the outer ring of helices in *E. hirae* is much smaller than in *I. tartaricus*, owing to the greater size of the *E. hirae* ring (10 K-subunits of four helices each versus 11 c-subunits of two helices each) and to the greater separation between the inner helices.

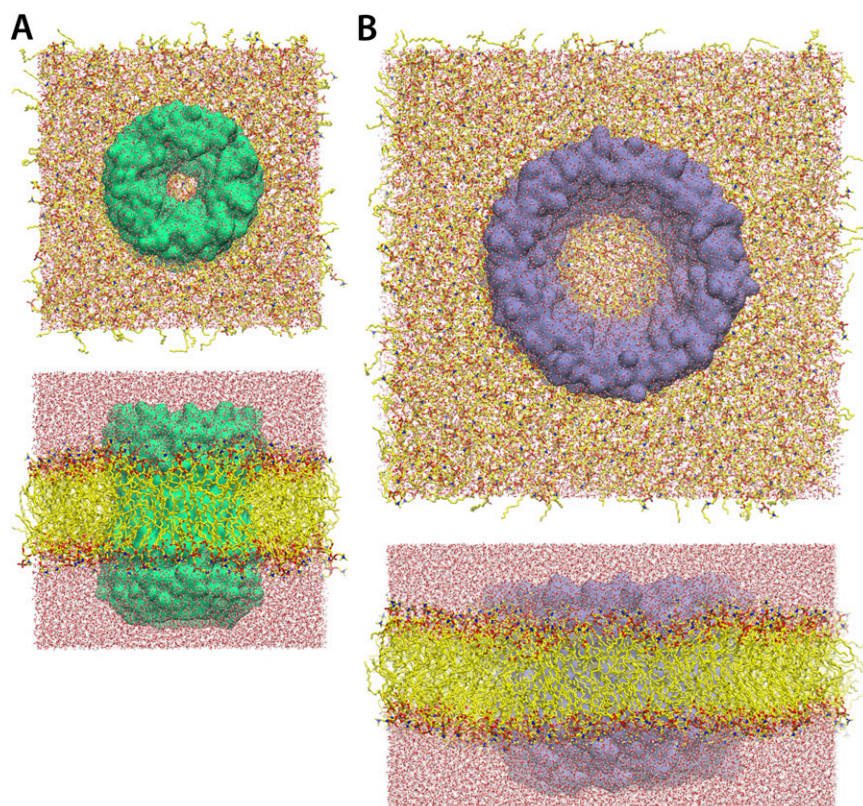

**Fig. S7.** All-atom molecular simulation models of the *I. tartaricus* and *E. hirae* c-rings. (A) The *I. tartaricus* c<sub>11</sub>-ring, viewed from the cytoplasm (Top) and along the membrane plane (Lower). The simulation system includes 237 1-palmitoyl-2-oleoyl-*sn*-glycero-3-phosphocholine (POPC) (yellow carbon atoms) lipid molecules, ~18,000 solvent water molecules (red oxygen atoms), summing up to a total of ~100,000 atoms. (B) The *E. hirae* K<sub>10</sub>-ring, viewed from the cytoplasm (Top) and along the membrane plane (Lower). The simulation system comprises 540 POPC molecules, ~380,500 water molecules, and 10 Cl<sup>-</sup> ions (added to counter the net charge of the ring), adding up to a total of ~210,000 atoms. The central opening in the *I. tartaricus* ring is occluded by two POPC molecules on the cytoplasmic side and three molecules on the periplasmic side. In the *E. hirae* ring, the much wider central opening allows for 18 and 17 POPC molecules on the cytoplasmic and periplasmic sides, respectively.

**Table S1.** Ion coordination distances in the most probable configurations of the Na<sup>+</sup>- and H<sup>+</sup>-bound states in simulations of the *I. tartaricus* and *E. hirae* c-rings

| c-Ring                                                   | Interaction                               | Distance, Å |
|----------------------------------------------------------|-------------------------------------------|-------------|
| <i>I. tartaricus</i>                                     |                                           |             |
| Na <sup>+</sup> -bound state (monodentate configuration) | Na <sup>+</sup> – E65:O <sub>ε2</sub>     | 2.16 ± 0.07 |
|                                                          | Na <sup>+</sup> – S66:O <sub>γ</sub>      | 2.3 ± 0.1   |
|                                                          | Na <sup>+</sup> – V63:O                   | 2.3 ± 0.1   |
|                                                          | Na <sup>+</sup> – Q32:O <sub>ε1</sub>     | 2.3 ± 0.1   |
|                                                          | Na <sup>+</sup> – W:O                     | 2.3 ± 0.1   |
| H <sup>+</sup> -bound state (most populated cluster)     | E65:O <sub>ε1</sub> – Y70:O <sub>H</sub>  | 2.9 ± 0.2   |
|                                                          | E65:O <sub>ε2</sub> – S66:O <sub>γ</sub>  | 2.8 ± 0.1   |
| <i>E. hirae</i>                                          |                                           |             |
| Na <sup>+</sup> -bound state (monodentate configuration) | Na <sup>+</sup> – E139:O <sub>ε2</sub>    | 2.15 ± 0.07 |
|                                                          | Na <sup>+</sup> – T64:O <sub>γ</sub>      | 2.3 ± 0.1   |
|                                                          | Na <sup>+</sup> – L61:O                   | 2.3 ± 0.1   |
|                                                          | Na <sup>+</sup> – Q110:O <sub>ε1</sub>    | 2.3 ± 0.1   |
|                                                          | Na <sup>+</sup> – Q65:O <sub>ε1</sub>     | 2.3 ± 0.1   |
| H <sup>+</sup> -bound state (most populated cluster)     | E139:O <sub>ε1</sub> – Y68:O <sub>H</sub> | 2.8 ± 0.2   |
|                                                          | E139:O <sub>ε2</sub> – T64:O <sub>γ</sub> | 2.8 ± 0.1   |
